# Supplementary material
Source: PubMed Central journal article supplement (PMC3436429)
Supplement: NIHMS402421-supplement-1_si_001.pdf [file NIHMS402421-supplement-1_si_001.pdf]

## Supplemental Information

### Intrinsic Dynamics of DNA-Polymer Complexes: a Mechanism for DNA Release

Lisa E. Prevette, Evgenia N. Nikolova, Hashim M. Al-Hashimi,\* Mark M. Banaszak Holl\*

University of Michigan, Department of Chemistry and Division of Biophysics, 911 N. University Ave., Ann Arbor, MI 48109

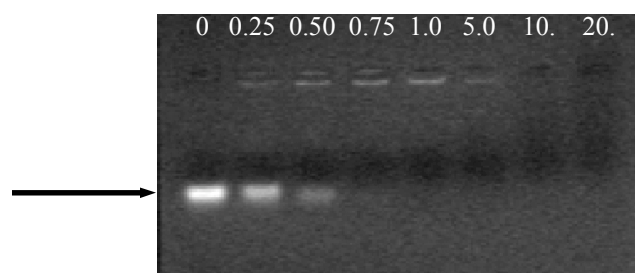

**Figure S1.** Agarose gel electrophoresis of 20-mer DNA at increasing +/- ratios of G5-NH<sub>2</sub>. Free DNA is indicated by the band marked with the arrow. Loss of migration of DNA in the lane indicates complexation with dendrimer.

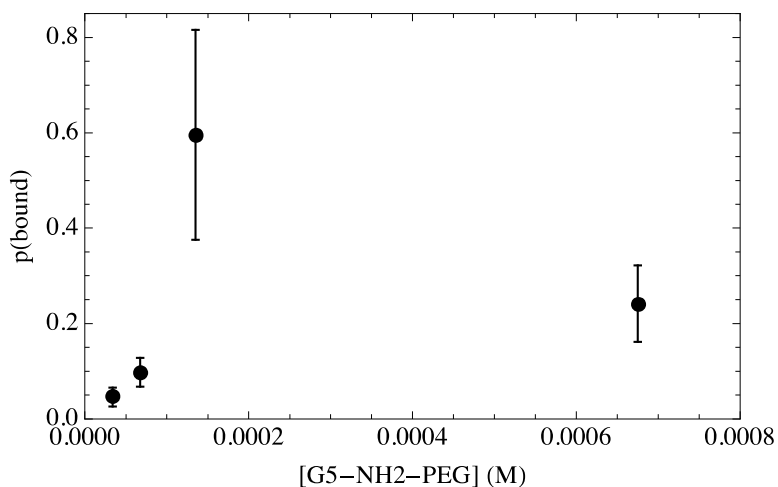

**Figure S2.** Fraction of bound DNA ( $p_{\text{bound}}$ ) as a function of dendrimer concentration, as determined by global fitting of the relaxation data (See **Table 2**;  $p_{\text{bound}} = 1 - p_{\text{free}}$ )

**Table S1.** Observed  $R_2$  values and amplitudes (Amp) from biexponential fitting of the decay of integrated DNA aromatic H2/H6/H8 (6.8-8.8 ppm) and ribose H1'/aromatic H5 (5.2-6.5 ppm) region versus delay time for increasing +/- ratios.

| +/- Ratio                    | $R_{2,obs1}$ (Hz)<br>(slow) | Amp 1           | $R_{2,obs2}$ (Hz)<br>(fast) | Amp 2           |
|------------------------------|-----------------------------|-----------------|-----------------------------|-----------------|
| <i>Aromatic (H2, H6, H8)</i> |                             |                 |                             |                 |
| 0                            | $3.40 \pm 1.79$             | $0.41 \pm 0.19$ | $14.5 \pm 2.6$              | $0.59 \pm 0.19$ |
| 0.25                         | $9.14 \pm 2.11$             | $0.50 \pm 0.08$ | $55.3 \pm 7.5$              | $0.54 \pm 0.08$ |
| 0.50                         | $18.5 \pm 8.6$              | $0.57 \pm 0.22$ | $93.5 \pm 32.3$             | $0.50 \pm 0.20$ |
| 1.0                          | $32.3 \pm 65.2$             | $0.33 \pm 0.37$ | $291.8 \pm 156.6$           | $0.95 \pm 0.31$ |
| 5.0                          | 0.0                         | $0.58 \pm 0.09$ | $192.8 \pm 94.8$            | $0.69 \pm 0.11$ |
| <i>Ribose (H1' and H5)</i>   |                             |                 |                             |                 |
| 0                            | $7.50 \pm 0.28$             | $0.85 \pm 0.02$ | $81.5 \pm 19.6$             | $0.16 \pm 0.02$ |
| 0.25                         | 0.0                         | $0.08 \pm 0.04$ | $25.3 \pm 2.4$              | $0.97 \pm 0.03$ |
| 0.50                         | 0.0                         | $0.07 \pm 0.04$ | $39.1 \pm 3.4$              | $0.95 \pm 0.04$ |
| 1.0                          | $81.1 \pm 136.2$            | $0.50 \pm 0.14$ | $474.3 \pm 136.2$           | $0.75 \pm 0.11$ |
| 5.0                          | 0.0                         | $0.24 \pm 0.02$ | $192.0 \pm 12.2$            | $0.89 \pm 0.02$ |
